# Supplementary material for: Preliminary clinical experience applying donor-derived cell-free DNA to discern rejection in pediatric liver transplant recipients
Source: PubMed Central journal article supplement (PMC7807012; doi:10.1038/s41598-020-80845-6), 2021-01-13
Supplement: 41598_2020_80845_MOESM1_ESM.pdf [file 41598_2020_80845_MOESM1_ESM.pdf]

---

**Preliminary clinical experience applying donor-derived cell-free DNA to  
discern rejection in pediatric liver transplant recipients**

**Authors:** Dong Zhao, Tao Zhou, Yi Luo, Cheng Wu, Dongwei Xu, Chengpeng  
Zhong, Wenming Cong, Qiang Liu, Jianjun Zhang, Qiang Xia

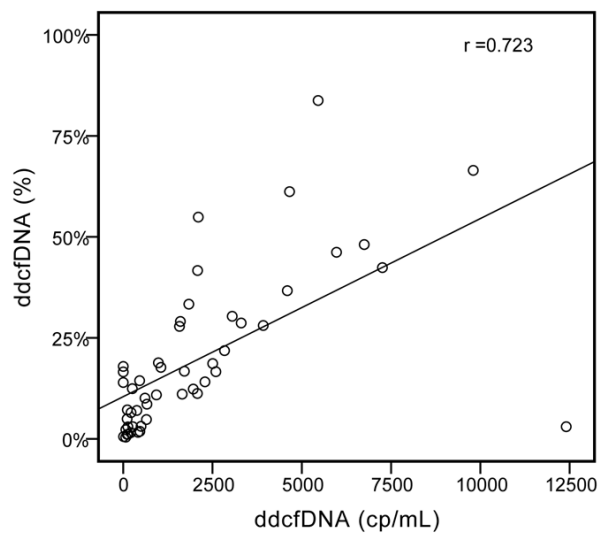

**Figure S1. Correlations between dd-cfDNA (%) and dd-cfDNA (cp/ml).** dd-cfDNA (%) was significantly associated with dd-cfDNA (cp/ml) with a spearman coefficient of 0.723 ( $p < 0.001$ ).

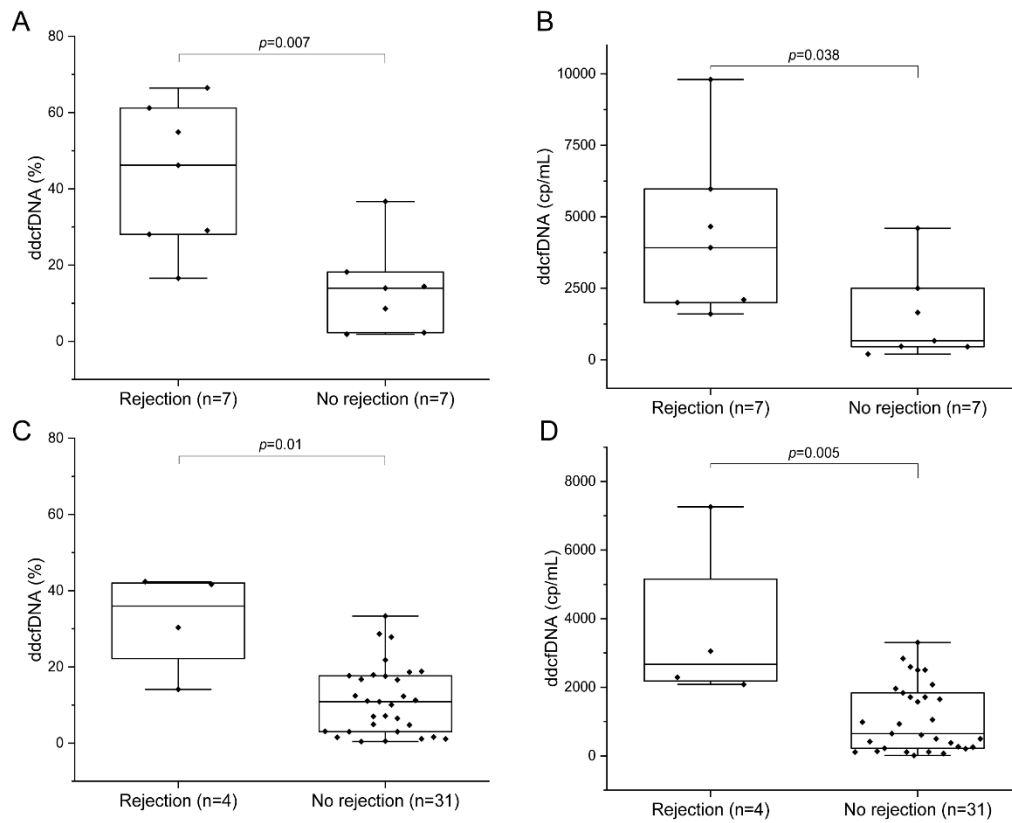

**Figure S2. dd-cfDNA levels in rejection and no rejection patients within the whole liver group and the LLS group.** Box plots of plasma dd-cfDNA% and plasma dd-cfDNA(cp/mL), horizontal line represents the median; bottom and top of each box represents 25th and 75th percentiles. Dots are individual values. (A) dd-cfDNA fraction (%) and (B) dd-cfDNA (cp/mL) in rejection and no rejection patients within whole liver group. (C) dd-cfDNA fraction (%) and (D) dd-cfDNA (cp/mL) in rejection and no rejection patients within LLS group. p values were determined by Mann-Whitney U test.

---

**Suppl Table 1. Details for excluded patients**

| <b>N</b> | <b>Reason</b>                            |
|----------|------------------------------------------|
| 9        | Not meeting inclusion criteria           |
| 10       | Declined to participate                  |
| 2        | Technical failure (clotted/DNA degraded) |
| 3        | Samples not properly preserved           |
| 3        | Multi-transfusion (too much foreign DNA) |

**Suppl Table2. Pediatric deceased donor characteristics(median/n)**

---

|                                 |             |
|---------------------------------|-------------|
| <b>Age(mons)</b>                | <b>14.3</b> |
| <b>Gender(%male)</b>            | <b>57.1</b> |
| <b>Warm ischemic time(mins)</b> | <b>11.3</b> |
| <b>Cold ischemic time(hrs)</b>  | <b>8.2</b>  |
| <b>Causes of death(n)</b>       |             |
| Cerebrovascular/stroke          | <b>6</b>    |
| Anoxia                          | <b>4</b>    |
| Head trauma                     | <b>3</b>    |
| CNS tumor                       | <b>1</b>    |

---

mons, months; mins, minutes; hrs, hours; n, numbers
